# Supplementary material
Source: publisher figshare collection journal article supplement (https://frontiersin.figshare.com/ndownloader/files/28105428)
Supplement: Supplementary file 1 [file 28105428]

## ***Supplementary Material***

**Supplementary Tables**

Supplementary Table 3S Coefficients for the cumulative link mixed effect model fitted for *Porites* polyp activity data. The intercept of the model was: days 0-15, no competition control for *Porites* and colony Pd.

|  | **Estimate** | **Std error** | **Z** | **P-value** |
| --- | --- | --- | --- | --- |
| 15-20 days | 0.21 | 0.20 | 1.01 | 3.0E-01 |
| 20-25 days | 1.43 | 0.24 | 6.03 | 1.6E-09 |
| 25-30 days | 2.08 | 0.28 | 7.43 | 1.1E-13 |
| 30-35 days | 1.29 | 0.31 | 4.12 | 3.7E-05 |
| 35-40 days | 1.56 | 0.33 | 4.75 | 2.1E-06 |
| 40-45 days | 1.03 | 0.30 | 3.49 | 4.9E-04 |
| 45-50 days | 1.73 | 0.35 | 5.01 | 5.6E-07 |
| 50-55 days | 1.97 | 0.36 | 5.39 | 7.1E-08 |
| 55-60 days | 2.28 | 0.37 | 6.10 | 1.0E-09 |
| Competition | -1.01 | 0.38 | -2.64 | 8.2E-03 |
| Colony Pe | 1.15 | 0.33 | 3.47 | 5.3E-04 |
| Colony Pf | 1.09 | 0.33 | 3.30 | 9.5E-04 |
